# Supplementary material
Source: PubMed Central journal article supplement (PMC7698652)
Supplement: Supp_Table1.pdf [file Supp_Table1.pdf]

## Supplementary Data

SUPPLEMENTARY TABLE S1. PRIMERS USED IN THIS STUDY

| <i>Gene</i>              | <i>Primer</i> | <i>Sequence</i>                 | <i>Product size</i> | <i>Reference</i>         |
|--------------------------|---------------|---------------------------------|---------------------|--------------------------|
| <i>mcr-9</i>             | Mcr-9-931F    | F: 5'-ACCGGTGTCTCGCTGTTATG-3'   | 519 bp              | This study               |
|                          | Mcr-9-1449R   | R: 5'-CATCCAGACCTGCATCGGAA-3'   |                     |                          |
| <i>aac(6)-Iaa</i>        | A6Iaa-102F    | F: 5'-CGAAGAAATCCTGCAAGCCG-3'   | 325 bp              | This study               |
|                          | A6Iaa-426R    | R: 5'-TCGGTAGAAAATGACGCGCT-3'   |                     |                          |
| <i>bla<sub>TEM</sub></i> | TEM-F         | F: 5'-AGTGCTGCCATAACCATGAGTG-3' | 431 bp              | Kim <i>et al.</i> (2009) |
|                          | TEM-R         | F: 5'-CTGACTCCCCGTCGTGTAGATA-3' |                     |                          |
| <i>qnrS</i>              | QnrS-F        | F: 5'-GACGTGCTAACTTGCGTGAT-3'   | 380 bp              | Kim <i>et al.</i> (2011) |
|                          | QnrS-R        | F: 5'-ACTTAAGTCTGACTCTTTCAG-3'  |                     |                          |

F, forward; R, reverse.

### Supplementary References

Kim J, Jeon S, Rhie H, Lee B, Park M, Lee H, Lee J, Kim S. Rapid detection of extended spectrum  $\beta$ -lactamase (ESBL) for *Enterobacteriaceae* by use of a multiplex PCR-based method. *Infect Chemother* 2009;41:181–184.

Kim K-Y, Park J-H, Kwak H-S, Woo G-J. Characterization of the quinolone resistance mechanism in foodborne *Salmonella* isolates with high nalidixic acid resistance. *Int J Food Microbiol* 2011;146:52–56.
